# Supplementary material for: Model‐Based Evaluation of Radiation and Radiosensitizing Agents in Oncology
Source: PubMed Central journal article supplement — CPT Pharmacometrics Syst Pharmacol. 2017 Dec 14;7(1):51–8. doi: 10.1002/psp4.12268 (PMC5784742; doi:10.1002/psp4.12268), 2017-12-14
Supplement: PSP4-7-51-s004.pdf [file PSP4-7-51-s004.pdf]

**Figure S1**

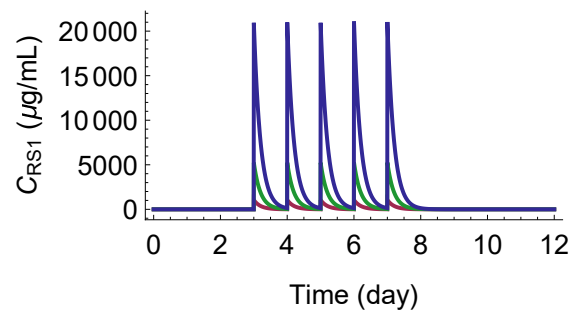

Figure S1: *Simulated median exposure profiles using a one-compartment pharmacokinetic model with parameter estimates from Table S1. Doses of 10 mg/kg (red), 50 mg/kg (green), or 200 mg/kg (blue) were administered on days 3,4,5,6, and 7*
