# Supplementary material for: Model‐Based Evaluation of Radiation and Radiosensitizing Agents in Oncology
Source: PubMed Central journal article supplement — CPT Pharmacometrics Syst Pharmacol. 2017 Dec 14;7(1):51–8. doi: 10.1002/psp4.12268 (PMC5784742; doi:10.1002/psp4.12268), 2017-12-14
Supplement: PSP4-7-51-s005.pdf [file PSP4-7-51-s005.pdf]

Figure S2

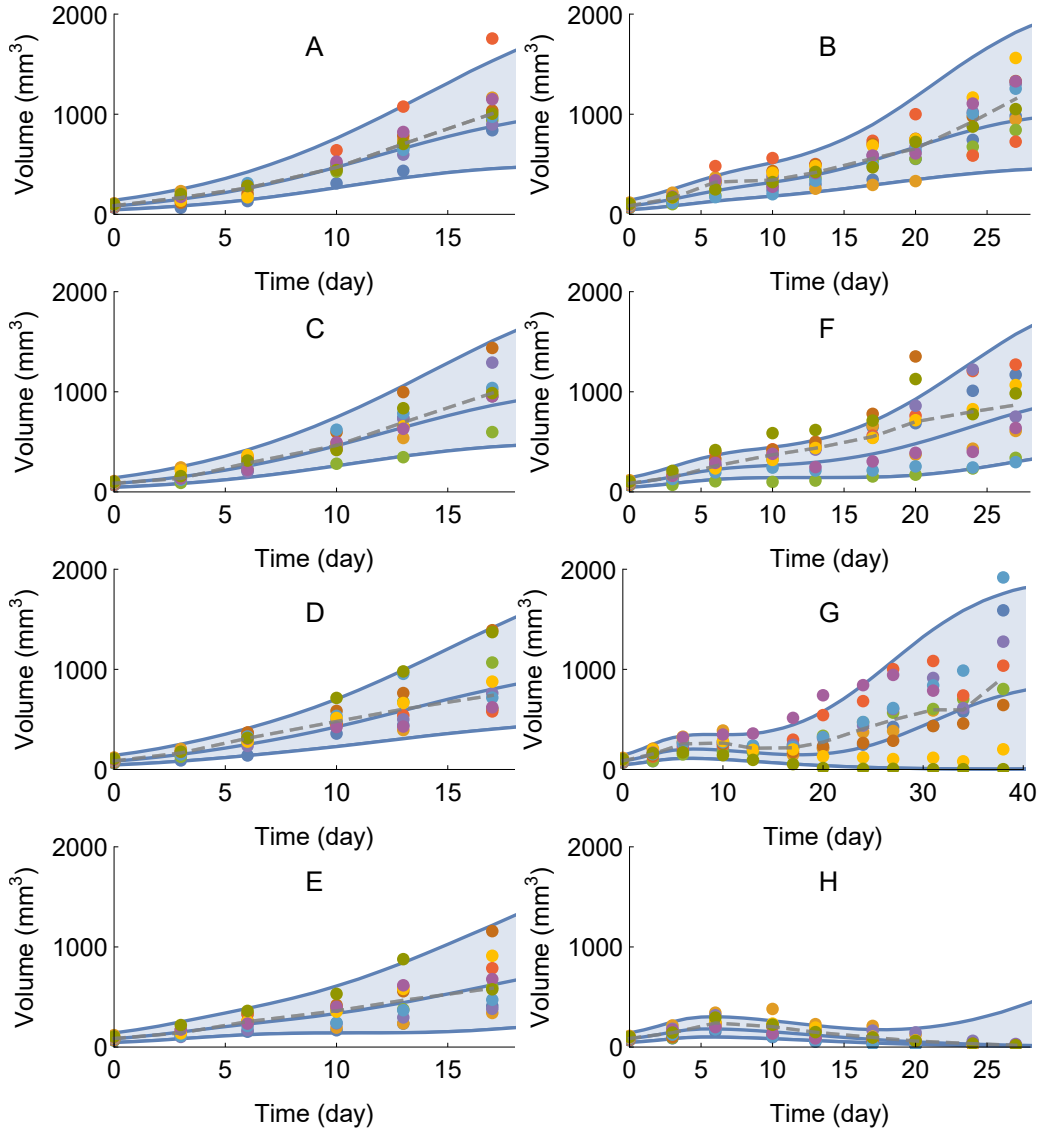

Figure S2: Visual predictive checks for each of the eight treatment groups: (A) vehicle, (B) radiation therapy (2 Gy per dose), (C-E) RS1 monotherapy (10, 50, or 200 mg/kg per dose), and (F-H) combination therapy with radiation (2 Gy per dose) and RS1 (10, 50, or 200 mg/kg per dose). Blue curves indicate simulated 5<sup>th</sup>, 50<sup>th</sup>, and 95<sup>th</sup> percentiles from the tumor model (Eq. 6,7) using parameter estimates from Table 1 and Table S1. Colored dots represent experimental observations. Two outlier data points (24,2188) and (27,3177) are not shown in plot (F)
